# Supplementary material for: Preparation, characterization and application of novel conductive NiO–CdO nanofibers with dislocation feature
Source: Royal Society of Chemistry journal article supplement (doi:10.1039/c1jm12623g), 2011-11-17
Supplement: c1jm12623g.pdf [file c1jm12623g.pdf]

**Electronic Supplementary Information**

**Preparation, characterization and application of novel  
conductive NiO-CdO nanofibers with dislocation feature**

*Yu Ding<sup>1</sup>, Ying Wang<sup>1</sup>, LiChun Zhang<sup>2</sup>, Heng Zhang<sup>2</sup>, Yu Lei<sup>1\*</sup>*

<sup>1</sup>Department of Chemical, Materials and Biomolecular Engineering and <sup>2</sup>Institute of Material  
Science, University of Connecticut, Storrs, CT 06269-3222, USA

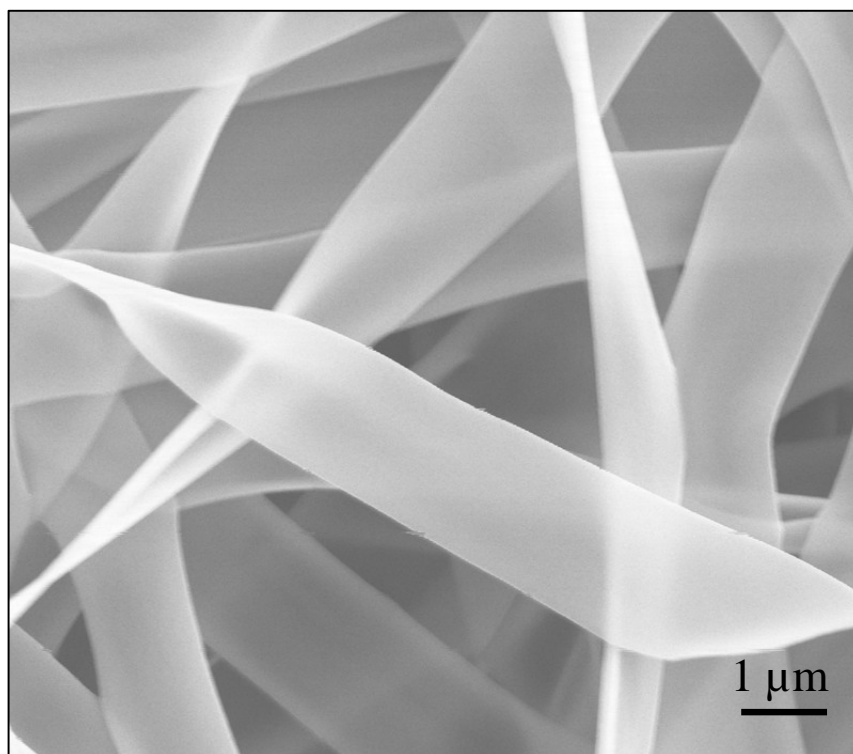

Figure S1. SEM image of  $\text{Cd}(\text{NO}_3)_2$ -PAA microbelts fabricated from  $\text{Cd}(\text{NO}_3)_2 \cdot 4\text{H}_2\text{O}$ -poly(acrylic acid) (30wt%:30wt%) aqueous sol-gel solution.

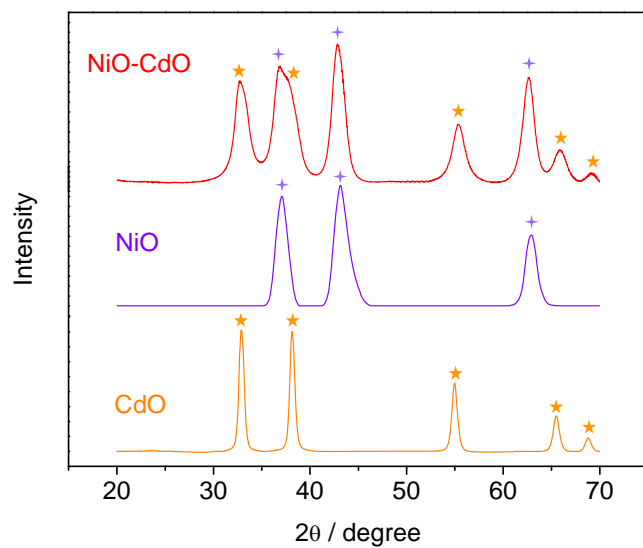

Figure S2. XRD patterns for NiO nanofibers, CdO nanofibers and NiO-CdO nanofibers.

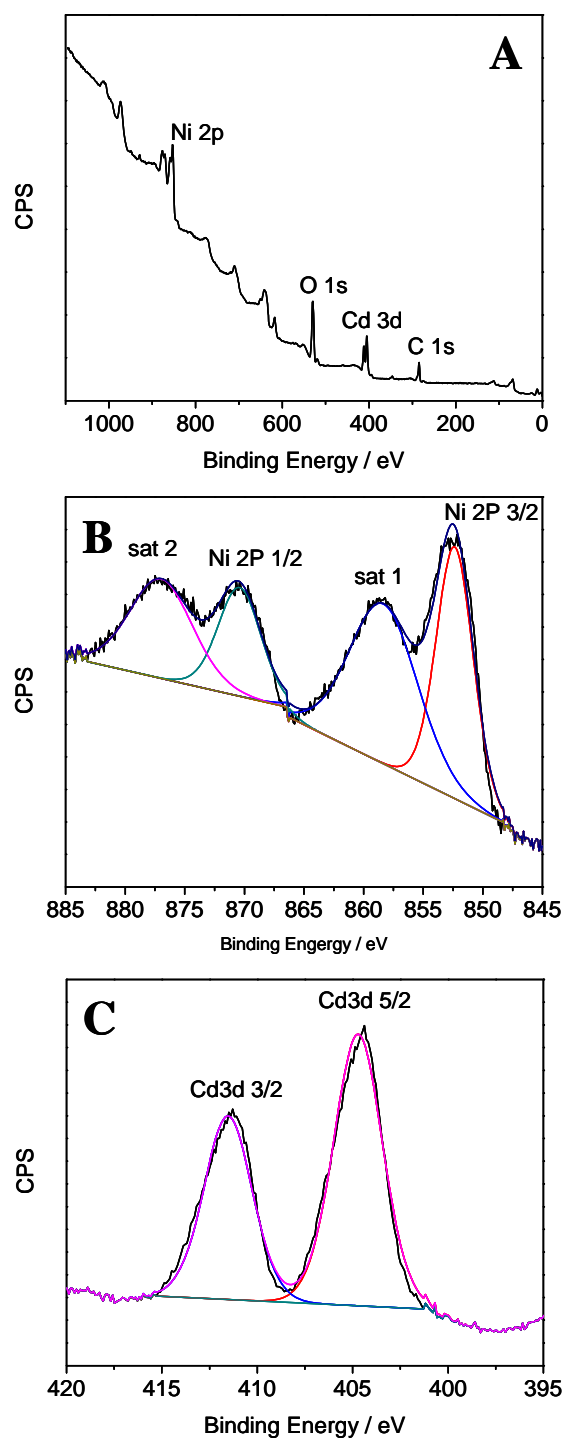

Figure S3. (A) XPS survey spectrum of NiO-CdO nanofibers. High resolution XPS spectrum of Ni 2p region (B) and Cd 3d region (C) for NiO-CdO nanofibers.

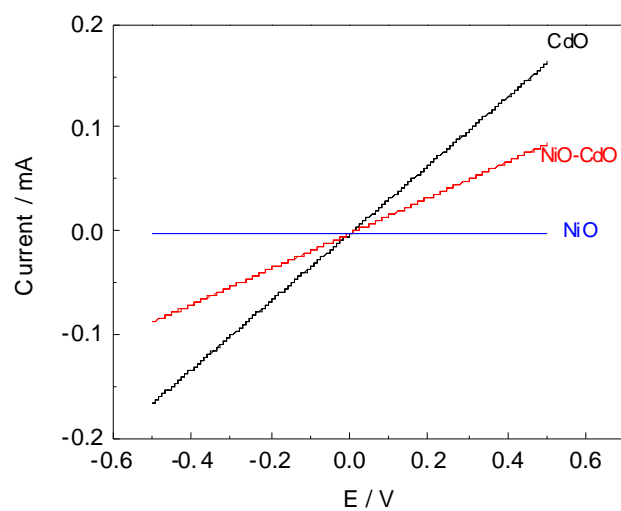

Figure S4. *I-V* curves of NiO nanofibers, NiO-CdO nanofibers and CdO nanofibers, respectively.

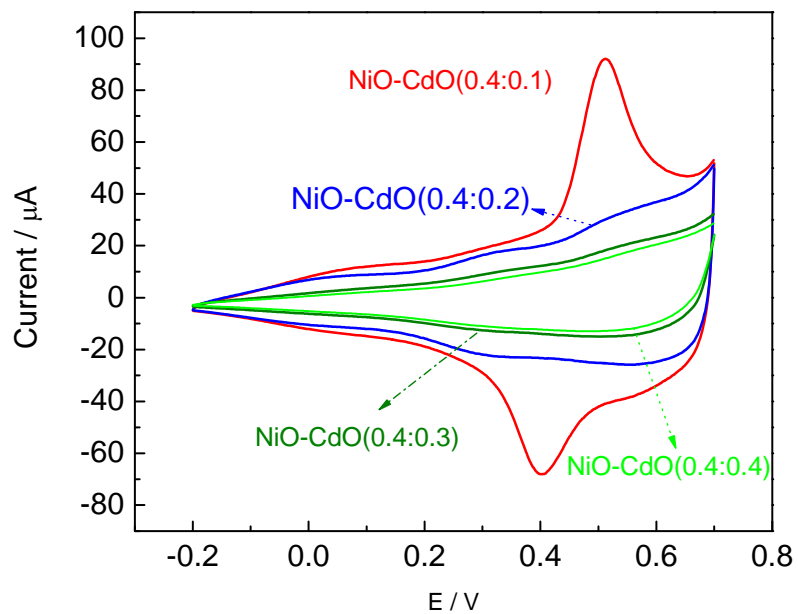

Figure S5. CVs of different NiO-CdO nanofibers in 0.1 M NaOH. Scan rate: 100 mV/s

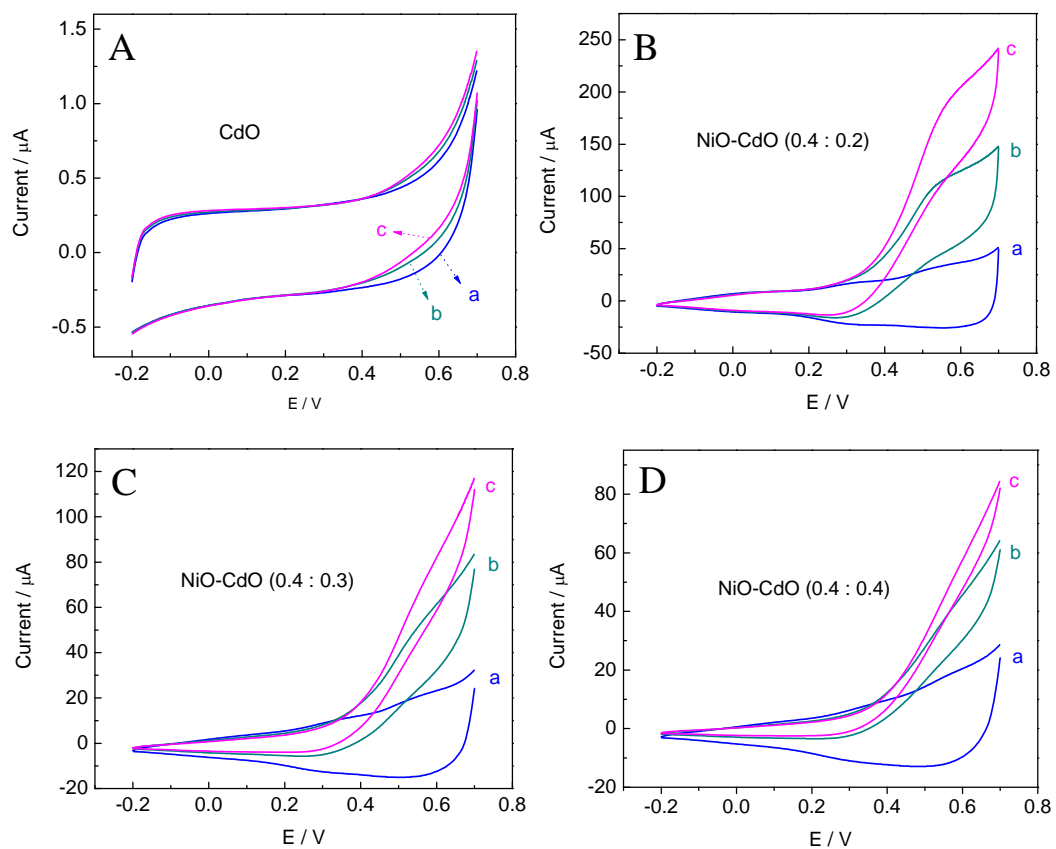

Figure S6. CVs of (A) CdO NFs/GCE, (B) NiO-CdO(0.4:0.2) NFs/GCE, (C) NiO-CdO(0.4:0.3) NFs/GCE, (D) NiO-CdO(0.4:0.4) NFs/GCE in the absence (trace a) and presence of 4 mM (trace b) and 8 mM glucose (trace c) in 0.1 M NaOH.

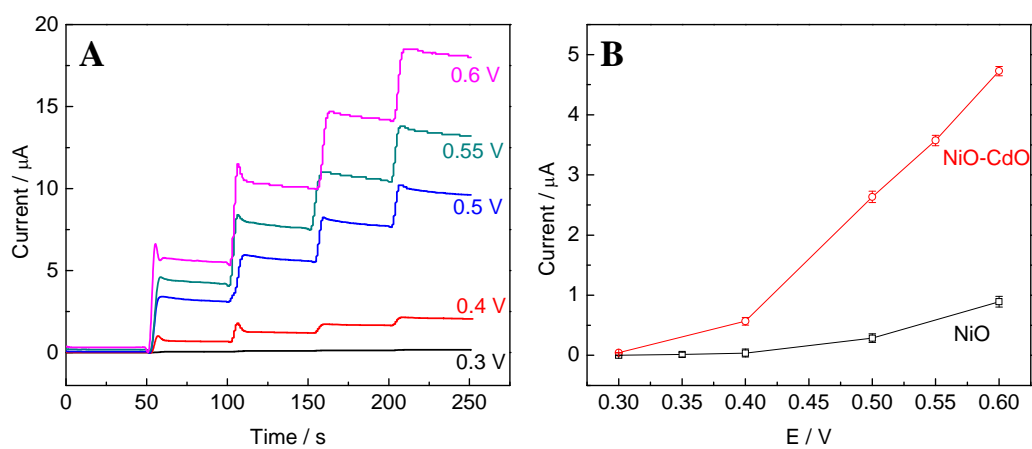

Figure S7. (A) Amperometric responses obtained at NiO-CdO (0.4:0.1) NFs/GCE to the additions of 200  $\mu\text{M}$  glucose at different applied potentials. (B) Corresponding hydrodynamic voltammograms of 200  $\mu\text{M}$  glucose.
